# Supplementary material
Source: Frontiers journal article supplement (https://www.frontiersin.org/articles/86904)
Supplement: Data_Sheet_1.DOCX [file Data_Sheet_1.DOCX]

**Table S1:** Reported error rates in original articles (=primary data) and reviews for next generation sequencing platforms

| Company / Platform | Error rate [%] | Primary data | Reference |
| --- | --- | --- | --- |
| Roche 454 | 1 | No | Glenn, 2011 |
|  | 1.1 | Yes | Gilles et al., 2011 |
|  | 4 | Yes | Margulies et al., 2005 |
|  | < 1 | No | Thompson and Milos, 2011 |
|  | 0.25 | Yes | Huse et al., 2007 |
|  | 0.4 | Yes | Quinlan et al., 2008 |
|  | 1.1 | Yes | Lind et al., 2010 |
|  | 0.4 – 0.5 | Yes | Niu et al., 2010 |
|  | 0.4 | Yes | Quince et al., 2011 |
|  | 0.11 – 0.34 | Yes | Vandenbroucke et al., 2011 |
|  | approx. 0.4 | Yes | Loman et al., 2012 |
|  | 0.46 | Yes | Jünemann et al., 2013 |
| Illumina | 0.5 | No | Mardis, 2013 |
|  | <0.1 for >85% of reads | No | Glenn, 2011 |
|  | <2 | No | Liu et al., 2012 |
|  | 1 – 1.5 | No | Shendure and Ji, 2008 |
|  | < 1 | No | Thompson and Milos, 2011 |
|  | 0.6 - 1 | Yes | Dohm et al., 2008 |
|  | 1.3 | Yes | Hillier et al., 2008 |
|  | 0.26 - 0.80 | Yes | Quail et al., 2012 |
|  | < 0.8 | Yes | Quail et al., 2008 |
|  | 2.5 – 7.3 | Yes | Minoche et al., 2011 |
|  | 5.2 – 6.0 | Yes | Nguyen et al., 2011 |
|  | approx. 0.1 | Yes | Loman et al., 2012 |
|  | 0.09 | Yes | Jünemann et al., 2013 |
| Ion PGM | 1 | No | Mardis, 2013 |
|  | 0.46 – 2.4 | No | Glenn, 2011 |
|  | 0.5 | Yes | Merriman et al., 2012 |
|  | approx. 1.5 | Yes | Loman et al., 2012 |
|  | 1.71 | Yes | Quail et al., 2012 |
|  | 1.68 – 4.84 | Yes | Bragg et al., 2013 |
|  | 0.42 – 0.79 | Yes | Jünemann et al., 2013 |

**Table S2:** Amplicon sequencing studies targeting the phyllosphere microbiota based on NGS technology

| Sequencing technology | Target group | Target gene | Sequencing adapter addition | Sequencing statistics | Plant species and type of sample | Major findings | Reference |
| --- | --- | --- | --- | --- | --- | --- | --- |
| Illumina, MiSeq,  250 bp paired end | Bacteria and fungi | 16S rRNA, V4; ITS1 | Barcoded primers, adapter addition by sequence provider | - 5,120,803 filtered bacterial reads and 3,241,736 filtered fungal reads | 273 grape must samples from eight wineries representing four major grape growing regions of California | - regional, site-specific, climatic and grape variety factors shaped the fungal and bacterial microbiota inhabiting wine-grape surfaces | Bokulich et al., 2014 |
| Roche 454 | Bacteria | 16S rRNA, V4 to V6 | Fusion primers | - 505,082 raw reads - 346,866 filtered reads | Rosettes of greenhouse grown *Arabidopsis thaliana* plants | - successional dynamics over a period 73 days: phyllosphere communities initially mirrored airborne communities, they subsequently converged to a distinct community composition | Maignien et al., 2014 |
| Roche 454 | Bacteria and fungi | 16S rRNA, V5-V9;  ITS | Fusion primers | - 30,515 filtered bacterial reads and 134,172 fungal reads - 40 – 3,294 bacterial and 1,353 – 9,303 fungal reads per sample - mean length of 750 bp for bacterial and 650 bp for fungal reads | Leaf samples of grapevine (*Vitis vinifera*) treated with chemical fungicide or biological control agent , taken from three vineyards in Italy | - bacterial and fungal communities were only minimally affected by chemical and biological treatments, - they mainly differed according to sampling site location | Perazzolli et al., 2014 |
| Roche 454 | Bacteria and fungi | 16S rRNA, V6;  ITS2 and D2 | Fusion primers | - 142,096 raw reads - 139,034 filtered reads; 79,398 for fungi (ITS2 plus D2) and 59,636 for bacteria - 2,070 – 9,462 reads per sample | Leaves of grapevine (*Vitis vinifera*) from a vineyard in Portugal collected over the growing season | - microbial communities were shown to be highly structured and dynamic - the major abundant microorganisms were the yeast-like fungus *Aureobasidium* and the prokaryotic Enterobacteriaceae | Pinto et al., 2014 |
| Roche 454 | Bacteria | 16S rRNA, V4 | Addition of barcodes and adapters in a 2nd PCR | - 35,965 filtered reads | Leaves and roots of tomato (*Solanum lycopersicum*) grown in productive greenhouses | - leaf endophytic communities strongly differed from those of the rhizosphere | Romero et al., 2014 |
| Roche 454 | Fungi | ITS1 | Addition of barcodes in a 2nd PCR (6 cycles); adapter addition by sequence provider | - 204,052 raw reads - 51,596 filtered reads - 1,388– 3,057 reads per sample | Garden grown balsam poplar *(Populus balsamifera)* genotypes | - host genotype shaped the foliar fungal microbiome | Bálint et al., 2013 |
| Roche 454 | Bacteria | 16S rRNA, V5 to V7 | Fusion primers | - mean read number 8,090 per sample - minimum of 4,329 sequences per sample | Rosettes and roots of naturally grown *Arabidopsis thaliana* plants from four sites | - bacterial communities differ between leaves and roots - different epi- and endophytic communities - leaf and root endophytic communities do not differ in richness, diversity and evenness, but in community composition - taxa with highest relative abundance are related to culturable species | Bodenhausen et al., 2013 |
| Ion PGM,  316 Chip | Fungi | ITS1 | Fusion primers | - 2,394,051 raw reads - liberal filtering: 461,596 reads - stringent filtering: 86,556 reads - mean read length 137 bp | Leaf, petiole, twig,  and trunk samples from *Eucalyptus grandis*, South Africa | - highly diverse families from across the Kingdom Fungi co-occurred within a few samples of plant tissue - communities were dominated by Ascomycota | Kemler et al., 2013 |
| Roche 454 | Bacteria | 16S rRNA | Adapter addition by sequence provider | - 50,299 filtered reads - 2,515 reads per sample - read length >200 bp | Organic and conventionally grown leafy salad vegetables (baby spinach, romaine lettuce,  red leaf lettuce, iceberg lettuce and green leaf lettuce) | - no significant differences in bacterial community composition on leaves of organic versus conventionally grown vegetables - the dominant taxa from sequence data were also detected by culture-dependent methods | Jackson et al., 2013 |
| Roche 454 | Bacteria | 16S rRNA, V4 | Fusion primers | - between 17,341 and 35,503 raw reads per sample | Spermosphere and phyllosphere of spinach (*Spinacia oleracea*) seedlings and plants | - bacterial richness higher on seedlings than on seeds and cotyledons | Lopez-Velasco et al., 2013 |
| Roche 454 | Bacteria | 16S rRNA, V3 to V5 | Fusion primers | - 193,289 raw reads - 90,815 filtered reads - 2,343 - 10,010 reads per sample | *Arabidopsis thaliana* leaf wax mutants grown outdoor | - altered bacterial phyllosphere community composition on cuticular wax mutants | Reisberg et al., 2013 |
| Roche 454 | Bacteria | 16S rRNA, V5 and V6 | Unknown | - 225,243 raw reads - 171,996 filtered reads - 50,865 reads after removing singletons - 1,838 – 10,776 reads per sample - Mean read number 5,733 per sample - Rarified to 1,838 reads per sample - Mean read length 335 bp | Flowers from six apple trees (*Malus domestica*)collected at five time points; streptomycin application to half of the trees when flowers opened | - bacterial communities dominated by members of TM7 and *Deinococcus-Thermus* - observation of a successional pattern and less abundant transient taxa - communities on trees sprayed with streptomycin had slightly lower phylogenetic diversity, but no differences in structure or succession | Shade et al., 2013 |
| Roche 454 | Bacteria and fungi | ITS;  16S rRNA | Fusion primers | - 50,835 ITS raw reads and 19,560 16S rRNA raw reads - 34,045 filtered ITS reads and 8,425 16S rRNA reads - 172 – 1,890 reads per sample | Strawberry (*Fragaria* x *ananassa*) treated with biological control agents against *Botrytis cinerea* | - altered fungal community composition at class level upon treatment with one of the tested biological control agents - no effects on bacterial community composition | Sylla et al., 2013 |
| Roche 454 | Bacteria | 16S rRNA, V5 to V9 | Fusion primers | - mean read number 5,116 per sample | Field grown Romaine lettuce from different plantings, inoculated with attenuated strain of *Escherichia coli* O157:H7 | - bacterial diversity differed in dependence of irrigation method, season, plant age, and in presence or absence of *E. coli* | Williams et al., 2013 |
| Roche 454 | Bacteria | 16S rRNA | Barcoded primers, adapter addition by sequence provider | - from only few sequences to 4,000 per sample - rarefied to 200 reads per sample | Conventional and organic analogs of eleven store-bought fruits and vegetables (sprouts, spinach, lettuce, tomatoes, peppers, strawberries, apples, peaches, grapes, and mushrooms) | - certain products shared more similar communities (high relative abundances of Enterobacteriaceae) compared to others (dominated by Actinobacteria, Bacteroidetes, Firmicutes, and Proteobacteria) - differences in community composition between conventional and organic analogs within product types; relative abundances of Enterobacteriaceae taxa less abundant in organically-grown products | Leff and Fierer, 2013 |
| Roche 454 | Bacteria and fungi | 16S rRNA, V2;  18S rRNA | Fusion primers | - 92,695 filtered 16S rRNA reads and 194,260 18S rRNA reads - mean read number per sample 3862 for 16S rRNA and 8094 for 18S rRNA amplicons | Leaves, stems, roots, flowers and fruits of outdoor grown tomato (*Solanum lycopersicum*) | - distinct microbial communities on different tomato plant organs - differences related to distance of the plant part from the soil | Ottesen et al., 2013 |
| Roche 454 | Fungi | ITS1 | Barcoded primers, adapter addition by sequence provider | - 1,285,911 raw reads - 953,385 filtered sequences - mean read number 28,040 per sample | Leaf and stem samples of pine tree *Pinus sylvestris* and its parasite *Viscum*  *album* | - interannual changes in endophytic community composition are smaller than seasonal changes - composition depends on host species and organ type, locality has a minor impact | Peršoh, 2013 |
| Roche 454 | Fungi | ITS1 | Fusion primers | - see Cordier et al 2012a | Beech (*Fagus sylvatica*) phyllosphere; data from the study of Cordier et al 2012a were used in this study | - underrepresentation of phytopathogenic and -parasitic ascomycetes, lichenized fungi and some basidiomycete taxa in cultivation-dependent approaches | Unterseher et al., 2013 |
| Roche 454 | Fungi | ITS1 and ITS2;  16S rRNA, V5 and V8 | Adapter addition by ligation | - 294,102 raw reads - 209,544 filtered reads - 1237 - 8046 reads per sample - mean read length 318 bp - sequencing of libraries from both ends | *Avicennia marina* and *Rhizophora stylosa* trees in a mangrove in New Caledonia | - host-specific highly diverse fungal communities on the two mangrove tree species in aerial and intertidal parts | Arfi et al., 2012 |
| Roche 454 | Fungi | ITS1 | Fusion primers | - mean read number of 2,400 and 6,195 for two datasets - 75 – 4,033 and 946 – 20,493 reads per sample for the two datasets | European beech (*Fagus sylvatica*) at four sites over a gradient of 1000 m of elevation in the French Pyrénées Mountains | - fungal community composition varied at sites of different elevation | Cordier et al., 2012b |
| Roche 454 | Fungi | ITS1 | Fusion primers | - 96,130 filtered reads - 123,163 raw reads - mean of 3,560 reads per sample - 386 – 6920 reads per sample | Samples from European beech *Fagus sylvatica* of four different spatial scales: tree, branch, group of leaves and individual leaf | - major part of the variability was at the smallest spatial scale, i. e. between individual leaves - at larger scale, genetic variation of trees affected phyllosphere fungal assemblages | Cordier et al., 2012a |
| Roche 454 | Fungi | ITS2 | Nested PCR approach with fusion primers in 2nd PCR | - 491,280 raw reads - 327,273 filtered reads - mean of 1,031 reads per sample - 502 – 2,423 reads per sample | Seasonal sampling of three bryophyte species in a Norwegian forest: *Hylocomium splendens*, *Pleuroium schreberi* and *Polytrichum commune* | - seasonal dynamics and host-specific patterns were observed besides effects of locality and tissue | Davey et al., 2013 |
| Roche 454 | Bacteria | 16 S rRNA, V4-V6 | Fusion primers | - 163,895 filtered reads - rarified to 8,700 reads per sample - mean read length 481 bp | Leaves of *Tamarix aphylla* trees, collected from a transect (500 km) in the Soronan desert | - diverse bacterial communities with four dominant phyla - geographical distance was the most important parameter that affected community composition | Finkel et al., 2012 |
| Roche 454 | Bacteria | 16S rRNA, V1–V3 | Fusion primers | - 21,930 filtered reads - mean of 1,327 reads per sample - 553 – 2,281 reads per sample - mean read length 431 bp | Leaves of six species of tropical trees  at a rainforest arboretum in Malaysia (*Arytera littoralis, Schizostachyum brachycladum, Dillenia excela, Dyera costulata, Gnetum sp. shorea maxima)* | - each tree species had a distinctive bacterial phyllosphere community - more similar communities on more closely related hosts - Acidobacteria were one of the most abundant phyla across all samples | Kim et al., 2012 |
| Roche 454 | Bacteria | 16S rRNA | Fusion primers | - 165,259 filtered reads - mean of 9,486 reads per sample - 5,852 – 12,836 reads per sample | Leaves of tomato (*Solanum lycopersicum*) from three different locations in Florida | - enrichments of *Salmonella* changes the taxonomic profile of a sample but does not necessarily increase detectability of *Salmonella* | Pettengill et al., 2012 |
| Roche 454 | Bacteria | 16S rRNA, V5 - V7 | Fusion primers | - 818,013 filtered reads - mean of 9,296 reads per sample - rarified to 2,836 reads per sample | Field-grown Romaine lettuce from California and Arizona | - differences in bacterial communities were related to season and field location, but not to plant cultivar | Rastogi et al., 2012 |
| Roche 454 | Fungi | ITS1 | Barcoded primers, adapter addition by sequence provider | - 665,155 filtered reads - Mean of 5,117 reads per sample - mean trimmed read length 157 bp | Endophytic fungi in leaves of *Metrosideros polymorpha* across environmental gradients but short geographic distance on Hawaii | - high diversity within sites and even higher diversity between sites - variation between sites correlated with temperature and rainfall | Zimmerman and Vitousek, 2012 |
| Roche 454 | Bacteria | 16S rRNA, V1-V2, | Fusion primers | - minimum of 1,300 reds per sample | Leaves of four *Weinmannia* tree species from a montane elevational gradient in eastern Peru | - tree associated phyllosphere bacteria exhibited no significant elevational gradient in diversity (in contrast to the plants) | Fierer et al., 2011 |
| Roche 454 | Bacteria, Archaea and fungi | 16S rRNA, V6;  18S rRNA, V9 | Fusion primers | - 158,980 filtered bacterial reads, 48,673 fungal reads, and 27,388 archaeal reads - mean of 11,355 bacterial reads per sample - read length of approx. 60 bp | Leaves from three *Tamarix* tree species grown in Mediterranean and  Dead Sea region  and two locations in the USA along ecological gradients | - microbial communities on different *Tamarix* species grown in the same location were highly similar, while trees of the same species growing in different climatic regions hosted distinct microbial communities | Finkel et al., 2011 |
| Roche 454 | Bacteria | 16S rRNA, V5 and V6 | Fusion primers | - 37,474 filtered reads - mean read number of 3,737 per sample - 1,726 – 6,343 reads per sample - rarified to 1,600 reads per sample - mean read length 465 bp | Grape leaves and berries collected from a vineyard | - bacterial communities differed on the surface of leaves and berries | Leveau and Tech, 2011 |
| Roche 454 | Bacteria | 16S rRNA, V4 | Fusion primers | - 14,686 – 24,294 raw reads per sample - mean read length of 200 bp | Freshly harvested and stored spinach (*Spinacia* *oleracea*) | - refrigerated conditions decreased species richness, diversity and evenness. - growth inhibition of Escherichia spp. Was achieved at 4°C, but not at 10°C | Lopez-Velasco et al., 2011 |
| Roche 454 | Bacteria and fungi | 16S rRNA, V1-V2;  ITS | Fusion primers | - 24,445 filtered bacterial reads - mean read length 475 bp for bacterial reads - no data for fungal reads | *Atriplex canescens* and *Atriplex torreyi* callus cultures | - micropropagated cultures were colonized by different bacterial and fungal taxa | Lucero et al., 2011 |
| Roche 454 | Bacteria | 16S rRNA, V1-V3 | Fusion primers | - 27,757 filtered reads - mean of 1,734 reads per sample | Fruit surface of field grown tomatoes (*Solanum*  *lycopersicum*) irrigated with water from different sources | - bacterial communities on tomato fruit surfaces did not differ in dependence of the irrigation water source | Telias et al., 2011 |
| Roche 454 | Fungi | ITS2 | Fusion primers | - 105,838 raw reads - 84,956 filtered reads - mean of 1,259 reads per sample - mean read length 268 bp | Leaves of oak (*Quercus macrocarpa*) from six sites in urban and nonurban environments collected over a growing season | - fungal communities were temporally dynamic - communities were diverse and differed between the urban and nonurban stands, albeit not consistently across the growing season | Jumpponen and Jones, 2010 |
| Roche 454 | Bacteria | 16S rRNA, V1 and V2 | Fusion primers | - 31,373 filtered reads - mean read length 215 bp, ranging from 150 to 316 bp | Pitcher plant fluid from *Sarracenia alata* | - high bacterial richness - increase in diversity and abundance with time - bacterial community composition changes over time | Koopman et al., 2010 |
| Roche 454 | Bacteria | 16S rRNA, V5 and V6 | Fusion primers | - 115,394 filtered reads - 600 – 1500 reads per sample - minimum of 600 reads per sample - mean read length of 240 bp | Leaves of 56 tree species in Colorado, and needles of *Pinus ponderosa* from various locations of the world | - higher variability in community composition between different tree species than within - correspondence between tree phylogeny and bacterial community phylogeny - minimal geographic differentiation across continents | Redford et al., 2010 |
| Roche 454 | Fungi | ITS1 | Fusion primers | - 18,020 filtered reads - 9,168 and 8,852 reads per sample - mean read length of 265 bp | Leaves of oak (*Quercus macrocarpa*) located within and outside a small urban center | - fungal phyllosphere communities were extremely diverse and strongly dominated by ascomycetes - fungal communities on plants from the urban center showed lower richness and diversity | Jumpponen and Jones, 2009 |

**List of rhizosphere papers that apply amplicon sequencing using NGS technologies**

Anderson, C.R., Condron, L.M., Clough, T.J., Fiers, M., Stewart, A., Hill, R.A., and Sherlock, R.R. (2011). Biochar induced soil microbial community change: implications for biogeochemical cycling of carbon, nitrogen and phosphorus. *Pedobiologia* 54**,** 309-320.

Anderson, M., and Habiger, J. (2012). Characterization and identification of productivity-associated Rhizobacteria in wheat. *Appl Environ Microbiol* 78**,** 4434-4446.

Andrew, D.R., Fitak, R.R., Munguia-Vega, A., Racolta, A., Martinson, V.G., and Dontsova, K. (2012). Abiotic factors shape microbial diversity in Sonoran Desert soils. *Appl Environ Microbiol* 78**,** 7527-7537.

Badri, D.V., Chaparro, J.M., Zhang, R., Shen, Q., and Vivanco, J.M. (2013a). Application of natural blends of phytochemicals derived from the root exudates of *Arabidopsis* to the soil reveal that phenolic-related compounds predominantly modulate the soil microbiome. *J Biol Chem* 288**,** 4502-4512.

Badri, D.V., Quintana, N., El Kassis, E.G., Kim, H.K., Choi, Y.H., Sugiyama, A., Verpoorte, R., Martinoia, E., Manter, D.K., and Vivanco, J.M. (2009). An ABC transporter mutation alters root exudation of phytochemicals that provoke an overhaul of natural soil microbiota. *Plant Physiol* 151**,** 2006-2017.

Badri, D.V., Zolla, G., Bakker, M.G., Manter, D.K., and Vivanco, J.M. (2013b). Potential impact of soil microbiomes on the leaf metabolome and on herbivore feeding behavior. *New Phytol* 198**,** 264-273.

Bakker, M.G., Bradeen, J.M., and Kinkel, L.L. (2013). Effects of plant host species and plant community richness on streptomycete community structure. *FEMS Microbiol Ecology* 83**,** 596-606.

Barriuso, J., Marin, S., and Mellado, R.P. (2010). Effect of the herbicide glyphosate on glyphosate-tolerant maize rhizobacterial communities: a comparison with pre-emergency applied herbicide consisting of a combination of acetochlor and terbuthylazine. *Environ Microbiol* 12**,** 1021-1030.

Barriuso, J., Marin, S., and Mellado, R.P. (2011a). Potential accumulative effect of the herbicide glyphosate on glyphosate-tolerant maize rhizobacterial communities over a three-year cultivation period. *PLoS One* 6**,** e27558.

Barriuso, J., and Mellado, R.P. (2012a). Glyphosate affects the rhizobacterial communities in glyphosate-tolerant cotton. *Appl Soil Ecol* 55**,** 20-26.

Barriuso, J., and Mellado, R.P. (2012b). Relative effect of glyphosate on glyphosate-tolerant maize rhizobacterial communities is not altered by soil properties. *J Microbiol Biotechnol* 22**,** 159-165.

Barriuso, J., Valverde, J.R., and Mellado, R.P. (2011b). Effect of the herbicide glyphosate on the culturable fraction of glyphosate-tolerant maize rhizobacterial communities using two different growth media. *Microbes Environ* 26**,** 332-338.

Becklin, K.M., Hertweck, K.L., and Jumpponen, A. (2012). Host identity impacts rhizosphere fungal communities associated with three alpine plant species. *Microb Ecol* 63**,** 682-693.

Bell, T.H., Hassan, S.E., Lauron-Moreau, A., Al-Otaibi, F., Hijri, M., Yergeau, E., and St-Arnaud, M. (2014). Linkage between bacterial and fungal rhizosphere communities in hydrocarbon-contaminated soils is related to plant phylogeny. *ISME J* 8**,** 331-343.

Blaalid, R., Carlsen, T., Kumar, S., Halvorsen, R., Ugland, K.I., Fontana, G., and Kauserud, H. (2012). Changes in the root-associated fungal communities along a primary succession gradient analysed by 454 pyrosequencing. *Mol Ecol* 21**,** 1897-1908.

Blaalid, R., Davey, M.L., Kauserud, H., Carlsen, T., Halvorsen, R., Hoiland, K., and Eidesen, P.B. (2014). Arctic root-associated fungal community composition reflects environmental filtering. *Mol Ecol* 23**,** 649-659.

Bodenhausen, N., Horton, M.W., and Bergelson, J. (2013). Bacterial communities associated with the leaves and the roots of *Arabidopsis thaliana*. *PLoS One* 8**,** e56329.

Bragina, A., Cardinale, M., Berg, C., and Berg, G. (2013). Vertical transmission explains the specific *Burkholderia* pattern in *Sphagnum* mosses at multi-geographic scale. *Front Microbiol* 4**,** 394.

Brown, S.P., and Jumpponen, A. (2014). Contrasting primary successional trajectories of fungi and bacteria in retreating glacier soils. *Mol Ecol* 23**,** 481-497.

Bulgarelli, D., Rott, M., Schlaeppi, K., Ver Loren Van Themaat, E., Ahmadinejad, N., Assenza, F., Rauf, P., Huettel, B., Reinhardt, R., Schmelzer, E., Peplies, J., Gloeckner, F.O., Amann, R., Eickhorst, T., and Schulze-Lefert, P. (2012). Revealing structure and assembly cues for *Arabidopsis* root-inhabiting bacterial microbiota. *Nature* 488**,** 91-95.

Carvalhais, L.C., Dennis, P.G., Badri, D.V., Tyson, G.W., Vivanco, J.M., and Schenk, P.M. (2013). Activation of the jasmonic acid plant defence pathway alters the composition of rhizosphere bacterial communities. *PLoS One* 8**,** e56457.

Cesarz, S., Fender, A.C., Beyer, F., Valtanen, K., Pfeiffer, B., Gansert, D., Hertel, D., Polle, A., Daniel, R., Leuschner, C., and Scheu, S. (2013). Roots from beech (*Fagus sylvatica* L.) and ash (*Fraxinus excelsior* L.) differentially affect soil microorganisms and carbon dynamics. *Soil Biol Biochem* 61**,** 23-32.

Cleary, D.F., Smalla, K., Mendonça-Hagler, L.C., and Gomes, N.C. (2012). Assessment of variation in bacterial composition among microhabitats in a mangrove environment using DGGE fingerprints and barcoded pyrosequencing. *PLoS One* 7**,** e29380.

Coats, V.C., Pelletreau, K.N., and Rumpho, M.E. (2014). Amplicon pyrosequencing reveals the soil microbial diversity associated with invasive Japanese barberry (*Berberis thunbergii* DC.). *Mol Ecol* 23**,** 1318-1332.

Cretoiu, M.S., Kielak, A.M., Abu Al-Soud, W., Sørensen, S.J., and Van Elsas, J.D. (2012). Mining of unexplored habitats for novel chitinases - *chiA* as a helper gene proxy in metagenomics. *Appl Microbiol Biotechnol* 94**,** 1347-1358.

Danielsen, L., Thürmer, A., Meinicke, P., Buée, M., Morin, E., Martin, F., Pilate, G., Daniel, R., Polle, A., and Reich, M. (2012). Fungal soil communities in a young transgenic poplar plantation form a rich reservoir for fungal root communities. *Ecol Evol* 2**,** 1935-1948.

Davey, M.L., Heegaard, E., Halvorsen, R., Kauserud, H., and Ohlson, M. (2013). Amplicon-pyrosequencing-based detection of compositional shifts in bryophyte-associated fungal communities along an elevation gradient. *Mol Ecol* 22**,** 368-383.

Davey, M.L., Heegaard, E., Halvorsen, R., Ohlson, M., and Kauserud, H. (2012). Seasonal trends in the biomass and structure of bryophyte-associated fungal communities explored by 454 pyrosequencing. *New Phytolog* 195**,** 844-856.

De Campos, S.B., Youn, J.W., Farina, R., Jaenicke, S., Jünemann, S., Szczepanowski, R., Beneduzi, A., Vargas, L.K., Goesmann, A., Wendisch, V.F., and Passaglia, L.M.P. (2013). Changes in root bacterial communities associated to two different development stages of canola (*Brassica napus* L. var *oleifera*) evaluated through next-generation sequencing technology. *Microb Ecol* 65**,** 593-601.

Dohrmann, A.B., Küting, M., Jünemann, S., Jaenicke, S., Schlüter, A., and Tebbe, C.C. (2013). Importance of rare taxa for bacterial diversity in the rhizosphere of Bt- and conventional maize varieties. *ISME J* 7**,** 37-49.

Donn, S., Kirkegaard, J.A., Perera, G., Richardson, A.E., and Watt, M. (2014). Evolution of bacterial communities in the wheat crop rhizosphere. *Environ Microbiol***,** DOI: 10.1111/1462-2920.12452.

Dumbrell, A.J., Ashton, P.D., Aziz, N., Feng, G., Nelson, M., Dytham, C., Fitter, A.H., and Helgason, T. (2011). Distinct seasonal assemblages of arbuscular mycorrhizal fungi revealed by massively parallel pyrosequencing. *New Phytol* 190**,** 794-804.

Eilers, K.G., Lauber, C.L., Knight, R., and Fierer, N. (2010). Shifts in bacterial community structure associated with inputs of low molecular weight carbon compounds to soil. *Soil Biol Biochem* 42**,** 896-903.

Farina, R., Beneduzi, A., Ambrosini, A., De Camposa, S.B., Lisboa, B.B., Wendisch, V., Vargas, L.K., and Passaglia, L.M.P. (2012). Diversity of plant growth-promoting rhizobacteria communities associated with the stages of canola growth. *Appl Soil Ecol* 55**,** 44-52.

Gomes, N.C., Cleary, D.F., Pinto, F.N., Egas, C., Almeida, A., Cunha, A., Mendonça-Hagler, L.C., and Smalla, K. (2010). Taking root: enduring effect of rhizosphere bacterial colonization in mangroves. *PLoS One* 5**,** e14065.

Gottel, N.R., Castro, H.F., Kerley, M., Yang, Z.M., Pelletier, D.A., Podar, M., Karpinets, T., Uberbacher, E., Tuskan, G.A., Vilgalys, R., Doktycz, M.J., and Schadt, C.W. (2011). Distinct microbial communities within the endosphere and rhizosphere of *Populus deltoides* roots across contrasting soil types. *Appl Environ Microbiol* 77**,** 5934-5944.

Haesler, F., Hagn, A., Engel, M., and Schloter, M. (2014). Impact of elevated atmospheric O3 on the actinobacterial community structure and function in the rhizosphere of European beech (*Fagus sylvatica* L.). *Front Microbiol* 5**,** DOI=10.3389/fmicb.2014.00036.

Hortal, S., Bastida, F., Armas, C., Lozano, Y.M., Moreno, J.L., Garcia, C., and Pugnaire, F.I. (2013). Soil microbial community under a nurse-plant species changes in composition, biomass and activity as the nurse grows. *Soil Biol Biochem* 64**,** 139-146.

Hur, M., Kim, Y., Song, H.R., Kim, J.M., Choi, Y.I., and Yi, H. (2011). Effect of genetically modified poplars on soil microbial communities during the phytoremediation of waste mine tailings. *Appl Environ Microbiol* 77**,** 7611-7619.

Hur, M., Lim, Y.W., Yu, J.J., Cheon, S.U., Choi, Y.I., Yoon, S.H., Park, S.C., Kim, D.I., and Yi, H. (2012). Fungal community associated with genetically modified poplar during metal phytoremediation. *J Microbiol* 50**,** 910-915.

Inceoğlu, O., Abu Al-Soud, W., Salles, J.F., Semenov, A.V., and Van Elsas, J.D. (2011). Comparative analysis of bacterial communities in a potato field as determined by pyrosequencing. *PLoS One* 6**,** e23321.

Jesus, E.D., Susilawati, E., Smith, S.L., Wang, Q., Chai, B.L., Farris, R., Rodrigues, J.L.M., Thelen, K.D., and Tiedje, J.M. (2010). Bacterial communities in the rhizosphere of biofuel crops grown on marginal lands as evaluated by 16S rRNA gene pyrosequences. *Bioenerg Res* 3**,** 20-27.

Jiang, X.T., Peng, X., Deng, G.H., Sheng, H.F., Wang, Y., Zhou, H.W., and Tam, N.F. (2013). Illumina sequencing of 16S rRNA tag revealed spatial variations of bacterial communities in a mangrove wetland. *Microb Ecol* 66**,** 96-104.

Jumpponen, A., Jones, K.L., David Mattox, J., and Yaege, C. (2010). Massively parallel 454-sequencing of fungal communities in *Quercus* spp. ectomycorrhizas indicates seasonal dynamics in urban and rural sites. *Mol Ecol* 19 Suppl 1**,** 41-53.

Kavamura, V.N., Taketani, R.G., Lançoni, M.D., Andreote, F.D., Mendes, R., and De Melo, I.S. (2013). Water regime influences bulk soil and rhizosphere of *Cereus jamacaru* bacterial communities in the Brazilian Caatinga biome. *PLoS One* 8**,** e73606.

Kawasaki, A., Watson, E.R., and Kertesz, M.A. (2012). Indirect effects of polycyclic aromatic hydrocarbon contamination on microbial communities in legume and grass rhizospheres. *Plant Soil* 358**,** 162-175.

Knelman, J.E., Legg, T.M., O'neill, S.P., Washenberger, C.L., González, A., Cleveland, C.C., and Nemergut, D.R. (2012). Bacterial community structure and function change in association with colonizer plants during early primary succession in a glacier forefield. *Soil Biol Biochem* 46**,** 172-180.

Köberl, M., Müller, H., Ramadan, E.M., and Berg, G. (2011). Desert farming benefits from microbial potential in arid soils and promotes diversity and plant health. *PLoS One* 6**,** e24452.

Koele, N., Dickie, I.A., Blum, J.D., Gleason, J.D., and De Graaf, L. (2014). Ecological significance of mineral weathering in ectomycorrhizal and arbuscular mycorrhizal ecosystems from a field-based comparison. *Soil Biol Biochem* 69**,** 63-70.

Kolton, M., Meller Harel, Y., Pasternak, Z., Graber, E.R., Elad, Y., and Cytryn, E. (2011). Impact of biochar application to soil on the root-associated bacterial community structure of fully developed greenhouse pepper plants. *Appl Environ Microbiol* 77**,** 4924-4930.

Kuramae, E.E., Verbruggen, E., Hillekens, R., De Hollander, M., Röling, W.F.M., Van Der Heijden, M.G.A., and Kowalchuk, G.A. (2013). Tracking fungal community responses to maize plants by DNA- and RNA-based pyrosequencing. *PLoS One* 8**,** e69973.

Lekberg, Y., Gibbons, S.M., Rosendahl, S., and Ramsey, P.W. (2013). Severe plant invasions can increase mycorrhizal fungal abundance and diversity. *ISME J* 7**,** 1424-1433.

Li, X.Z., Rui, J.P., Mao, Y.J., Yannarell, A., and Mackie, R. (2014). Dynamics of the bacterial community structure in the rhizosphere of a maize cultivar. *Soil Biol Biochem* 68**,** 392-401.

Lothamer, K., Brown, S.P., Mattox, J.D., and Jumpponen, A. (2013). Comparison of root-associated communities of native and non-native ectomycorrhizal hosts in an urban landscape. *Mycorrhiza*.

Lumini, E., Orgiazzi, A., Borriello, R., Bonfante, P., and Bianciotto, V. (2010). Disclosing arbuscular mycorrhizal fungal biodiversity in soil through a land-use gradient using a pyrosequencing approach. *Environ Microbiol* 12**,** 2165-2179.

Lundberg, D.S., Lebeis, S.L., Paredes, S.H., Yourstone, S., Gehring, J., Malfatti, S., Tremblay, J., Engelbrektson, A., Kunin, V., Del Rio, T.G., Edgar, R.C., Eickhorst, T., Ley, R.E., Hugenholtz, P., Tringe, S.G., and Dangl, J.L. (2012). Defining the core *Arabidopsis thaliana* root microbiome. *Nature* 488**,** 86-90.

Marques, J.M., Da Silva, T.F., Vollu, R.E., Blank, A.F., Ding, G.C., Seldin, L., and Smalla, K. (2014). Plant age and genotype affect the bacterial community composition in the tuber rhizosphere of field-grown sweet potato plants. *FEMS Microbiol Ecol*.

Menkis, A., Burokiené, D., Gaitnieks, T., Uotila, A., Johannesson, H., Rosling, A., Finlay, R.D., Stenlid, J., and Vasaitis, R. (2012). Occurrence and impact of the root-rot biocontrol agent *Phlebiopsis gigantea* on soil fungal communities in *Picea abies* forests of northern Europe. *FEMS Microbiol Ecol* 81**,** 438-445.

Moora, M., Berger, S., Davison, J., Öpik, M., Bommarco, R., Bruelheide, H., Kühn, I., Kunin, W.E., Metsis, M., Rortais, A., Vanatoa, A., Vanatoa, E., Stout, J.C., Truusa, M., Westphal, C., Zobel, M., and Walther, G.R. (2011). Alien plants associate with widespread generalist arbuscular mycorrhizal fungal taxa: evidence from a continental-scale study using massively parallel 454 sequencing. *J Biogeogr* 38**,** 1305-1317.

Mouhamadou, B., Puissant, J., Personeni, E., Desclos-Theveniau, M., Kastl, E.M., Schloter, M., Zinger, L., Roy, J., Geremia, R.A., and Lavorel, S. (2013). Effects of two grass species on the composition of soil fungal communities. *Biol Fertil Soils* 49**,** 1131-1139.

Navarrete, A.A., Kuramae, E.E., De Hollander, M., Pijl, A.S., Van Veen, J.A., and Tsai, S.M. (2013). Acidobacterial community responses to agricultural management of soybean in Amazon forest soils. *FEMS Microbiol Ecol* 83**,** 607-621.

Ofek, M., Hadar, Y., and Minz, D. (2012). Ecology of root colonizing *Massilia* (Oxalobacteraceae). *PLoS One* 7**,** e40117.

Oh, Y.M., Kim, M., Lee-Cruz, L., Lai-Hoe, A., Go, R., Ainuddin, N., Rahim, R.A., Shukor, N., and Adams, J.M. (2012). Distinctive bacterial communities in the rhizoplane of four tropical tree species. *Microb Ecol* 64**,** 1018-1027.

Öpik, M., Zobel, M., Cantero, J.J., Davison, J., Facelli, J.M., Hiiesalu, I., Jairus, T., Kalwij, J.M., Koorem, K., Leal, M.E., Liira, J., Metsis, M., Neshataeva, V., Paal, J., Phosri, C., Põlme, S., Reier, U., Saks, U., Schimann, H., Thiéry, O., Vasar, M., and Moora, M. (2013). Global sampling of plant roots expands the described molecular diversity of arbuscular mycorrhizal fungi. *Mycorrhiza*.

Peiffer, J.A., Spor, A., Koren, O., Jin, Z., Tringe, S.G., Dangl, J.L., Buckler, E.S., and Ley, R.E. (2013). Diversity and heritability of the maize rhizosphere microbiome under field conditions. *Proc Natl Acad Sci U S A* 110**,** 6548-6553.

Penton, C.R., Gupta, V.V., Tiedje, J.M., Neate, S.M., Ophel-Keller, K., Gillings, M., Harvey, P., Pham, A., and Roget, D.K. (2014). Fungal community structure in disease suppressive soils assessed by 28S LSU gene sequencing. *PLoS One* 9**,** e93893.

Pfeiffer, B., Fender, A.C., Lasota, S., Hertel, D., Jungkunst, H.F., and Daniel, R. (2013). Leaf litter is the main driver for changes in bacterial community structures in the rhizosphere of ash and beech. *Appl Soil Ecol* 72**,** 150-160.

Pires, A.C., Cleary, D.F., Almeida, A., Cunha, A., Dealtry, S., Mendonça-Hagler, L.C., Smalla, K., and Gomes, N.C. (2012). Denaturing gradient gel electrophoresis and barcoded pyrosequencing reveal unprecedented archaeal diversity in mangrove sediment and rhizosphere samples. *Appl Environ Microbiol* 78**,** 5520-5528.

Preem, J.K., Truu, J., Truu, M., Mander, U., Oopkaup, K., Lõhmus, K., Helmisaari, H.S., Uri, V., and Zobel, M. (2012). Bacterial community structure and its relationship to soil physico-chemical characteristics in alder stands with different management histories. *Ecol Eng* 49**,** 10-17.

Qiu, M.H., Zhang, R.F., Xue, C., Zhang, S.S., Li, S.Q., Zhang, N., and Shen, Q.R. (2012). Application of bio-organic fertilizer can control *Fusarium* wilt of cucumber plants by regulating microbial community of rhizosphere soil. *Biol Fertil Soils* 48**,** 807-816.

Rosenzweig, N., Bradeen, J.M., Tu, Z.J., Mckay, S.J., and Kinkel, L.L. (2013). Rhizosphere bacterial communities associated with long-lived perennial prairie plants vary in diversity, composition, and structure. *Can J Microbiol* 59**,** 494-502.

Rosenzweig, N., Tiedje, J.M., Quensen, J.F., Meng, Q.X., and Hao, J.J.J. (2012). Microbial communities associated with potato common scab-suppressive soil determined by pyrosequencing analyses. *Plant Dis* 96**,** 718-725.

Rossmann, B., Müller, H., Smalla, K., Mpiira, S., Tumuhairwe, J.B., Staver, C., and Berg, G. (2012). Banana-associated microbial communities in Uganda are highly diverse but dominated by Enterobacteriaceae. *Applied Environ Microbiol* 78**,** 4933-4941.

Schlaeppi, K., Dombrowski, N., Oter, R.G., Van Themaat, E.V.L., and Schulze-Lefert, P. (2014). Quantitative divergence of the bacterial root microbiota in *Arabidopsis thaliana* relatives. *Proc Natl Acad Sci U S A* 111**,** 585-592.

Schmidt, R., Köberl, M., Mostafa, A., Ramadan, E.M., Monschein, M., Jensen, K.B., Bauer, R., and Berg, G. (2014). Effects of bacterial inoculants on the indigenous microbiome and secondary metabolites of chamomile plants. *Front Microbiol* 5.

Shakya, M., Gottel, N., Castro, H., Yang, Z.M.K., Gunter, L., Labbé, J., Muchero, W., Bonito, G., Vilgalys, R., Tuskan, G., Podar, M., and Schadt, C.W. (2013). A multifactor analysis of fungal and bacterial community structure in the root microbiome of mature *Populus deltoides* trees. *PLoS One* 8**,** e76382.

Somenahally, A.C., Hollister, E.B., Loeppert, R.H., Yan, W.G., and Gentry, T.J. (2011). Microbial communities in rice rhizosphere altered by intermittent and continuous flooding in fields with long-term arsenic application. *Soil Biol Biochem* 43**,** 1220-1228.

Sugiyama, A., Bakker, M.G., Badri, D.V., Manter, D.K., and Vivanco, J.M. (2013). Relationships between Arabidopsis genotype-specific biomass accumulation and associated soil microbial communities. *Botany-Botanique* 91**,** 123-126.

Tannierès, M., Beury-Cirou, A., and Faure, D. (2012). Growth biostimulation of quorum-quenching bacteria by gammagamma-heptalactone treatment in the hydroponic rhizosphere of *Solanum tuberosum*. *Commun Agric Appl Biol Sci* 77**,** 29-37.

Tannierès, M., Beury-Cirou, A., Vigouroux, A., Mondy, S., Pellissier, F., Dessaux, Y., and Faure, D. (2013). A metagenomic study highlights phylogenetic proximity of quorum-quenching and xenobiotic-degrading amidases of the AS-family. *PLoS One* 8**,** e65473.

Tedersoo, L., Nilsson, R.H., Abarenkov, K., Jairus, T., Sadam, A., Saar, I., Bahram, M., Bechem, E., Chuyong, G., and Kõljalg, U. (2010). 454 Pyrosequencing and Sanger sequencing of tropical mycorrhizal fungi provide similar results but reveal substantial methodological biases. *New Phytol* 188**,** 291-301.

Teixeira, L.C.R.S., Peixoto, R.S., Cury, J.C., Sul, W.J., Pellizari, V.H., Tiedje, J., and Rosado, A.S. (2010). Bacterial diversity in rhizosphere soil from Antarctic vascular plants of Admiralty Bay, maritime Antarctica. *ISME J* 4**,** 989-1001.

Toju, H., Sato, H., and Tanabe, A.S. (2014). Diversity and spatial structure of belowground plant-fungal symbiosis in a mixed subtropical forest of ectomycorrhizal and arbuscular mycorrhizal plants. *PLoS One* 9**,** e86566.

Toju, H., Sato, H., Yamamoto, S., Kadowaki, K., Tanabe, A.S., Yazawa, S., Nishimura, O., and Agata, K. (2013a). How are plant and fungal communities linked to each other in belowground ecosystems? A massively parallel pyrosequencing analysis of the association specificity of root-associated fungi and their host plants. *Ecol Evol* 3**,** 3112-3124.

Toju, H., Yamamoto, S., Sato, H., and Tanabe, A.S. (2013b). Sharing of diverse mycorrhizal and root-endophytic fungi among plant species in an oak-dominated cool-temperate forest. *PLoS One* 8**,** e78248.

Toju, H., Yamamoto, S., Sato, H., Tanabe, A.S., Gilbert, G.S., and Kadowaki, K. (2013c). Community composition of root-associated fungi in a *Quercus*-dominated temperate forest: "codominance" of mycorrhizal and root-endophytic fungi. *Ecol and Evol* 3**,** 1281-1293.

Torres-Cortés, G., Millan, V., Fernandez-González, A.J., Aguirre-Garrido, J.F., Ramírez-Saad, H.C., Fernandez-López, M., Toro, N., and Martínez-Abarca, F. (2012). Bacterial community in the rhizosphere of the cactus species *Mammillaria carnea* during dry and rainy seasons assessed by deep sequencing. *Plant Soil* 357**,** 275-288.

Uhlik, O., Musilova, L., Ridl, J., Hroudova, M., Vlcek, C., Koubek, J., Holeckova, M., Mackova, M., and Macek, T. (2013). Plant secondary metabolite-induced shifts in bacterial community structure and degradative ability in contaminated soil. *Appl Microbiol Biotechnol* 97**,** 9245-9256.

Uroz, S., Buée, M., Murat, C., Frey-Klett, P., and Martin, F. (2010). Pyrosequencing reveals a contrasted bacterial diversity between oak rhizosphere and surrounding soil. *Env Microbiol Rep* 2**,** 281-288.

Uroz, S., Oger, P., Morin, E., and Frey-Klett, P. (2012). Distinct ectomycorrhizospheres share similar bacterial communities as revealed by pyrosequencing-based analysis of 16S rRNA genes. *Appl Environ Microbiol* 78**,** 3020-3024.

Vannini, A., Bruni, N., Tomassini, A., Franceschini, S., and Vettraino, A.M. (2013). Pyrosequencing of environmental soil samples reveals biodiversity of the *Phytophthora* resident community in chestnut forests. *FEMS Microbiol Ecol* 85**,** 433-442.

Vik, U., Logares, R., Blaalid, R., Halvorsen, R., Carlsen, T., Bakke, I., Kolstø, A.B., Økstad, O.A., and Kauserud, H. (2013). Different bacterial communities in ectomycorrhizae and surrounding soil. *Sci Rep* 3.

Wallander, H., Johansson, U., Sterkenburg, E., Brandström Durling, M., and Lindahl, B.D. (2010). Production of ectomycorrhizal mycelium peaks during canopy closure in Norway spruce forests. *New Phytol* 187**,** 1124-1134.

Xu, L.H., Ravnskov, S., Larsen, J., and Nicolaisen, M. (2012). Linking fungal communities in roots, rhizosphere, and soil to the health status of *Pisum sativum*. *FEMS Microbiol Ecol* 82**,** 736-745.

Yang, C., Hamel, C., Gan, Y.T., and Vujanovic, V. (2012a). Bacterial endophytes mediate positive feedback effects of early legume termination times on the yield of subsequent durum wheat crops. *Can J Microbiol* 58**,** 1368-1377.

Yang, C., Hamel, C., Gan, Y.T., and Vujanovic, V. (2012b). Tag-encoded pyrosequencing analysis of the effects of fungicide application and plant genotype on rhizobacterial communities. *Appl Soil Ecol* 60**,** 92-97.

Yang, C., Hamel, C., Gan, Y.T., and Vujanovic, V. (2013). Pyrosequencing reveals how pulses influence rhizobacterial communities with feedback on wheat growth in the semiarid Prairie. *Plant Soil* 367**,** 493-505.

Yergeau, E., Sanschagrin, S., Maynard, C., St-Arnaud, M., and Greer, C.W. (2014). Microbial expression profiles in the rhizosphere of willows depend on soil contamination. *ISME J* 8**,** 344-358.

Yin, C.T., Hulbert, S.H., Schroeder, K.L., Mavrodi, O., Mavrodi, D., Dhingra, A., Schillinger, W.F., and Paulitz, T.C. (2013). Role of bacterial communities in the natural suppression of *Rhizoctonia solani* bare patch disease of wheat (*Triticum aestivum* L.). *Appl Environ Microbiol* 79**,** 7428-7438.

Yu, L., Nicolaisen, M., Larsen, J., and Ravnskov, S. (2012a). Molecular characterization of root-associated fungal communities in relation to health status of *Pisum sativum* using barcoded pyrosequencing. *Plant Soil* 357**,** 395-405.

Yu, L., Nicolaisen, M., Larsen, J., and Ravnskov, S. (2012b). Succession of root-associated fungi in *Pisum sativum* during a plant growth cycle as examined by 454 pyrosequencing. *Plant Soil* 358**,** 216-224.

Zancarini, A., Mougel, C., Terrat, S., Salon, C., and Munier-Jolain, N. (2013). Combining ecophysiological and microbial ecological approaches to study the relationship between *Medicago truncatula* genotypes and their associated rhizosphere bacterial communities. *Plant Soil* 365**,** 183-199.

Zhang, Q., Sun, J., Liu, S.Z., and Wei, Q.P. (2013a). Manure refinement affects apple rhizosphere bacterial community structure: a study in sandy soil. *PLoS One* 8**,** e76937.

Zhang, W., Wu, X.K., Liu, G.X., Chen, T., Zhang, G.S., Dong, Z.B., Yang, X., and Hu, P. (2013b). Pyrosequencing reveals bacterial diversity in the rhizosphere of three *Phragmites australis* ecotypes. *Geomicrobiol J* 30**,** 593-599.

Zolla, G., Badri, D.V., Bakker, M.G., Manter, D.K., and Viyanco, J.M. (2013). Soil microbiomes vary in their ability to confer drought tolerance to *Arabidopsis*. *Appl Soil Ecol* 68**,** 1-9.

**References Table S1 and Table S2**

Arfi, Y., Buée, M., Marchand, C., Levasseur, A., and Record, E. (2012). Multiple markers pyrosequencing reveals highly diverse and host-specific fungal communities on the mangrove trees *Avicennia marina* and *Rhizophora stylosa*. *FEMS Microbiol Ecol* 79**,** 433-444.

Bálint, M., Tiffin, P., Hallström, B., O'hara, R.B., Olson, M.S., Fankhauser, J.D., Piepenbring, M., and Schmitt, I. (2013). Host genotype shapes the foliar fungal microbiome of balsam poplar (*Populus balsamifera*). *PLoS One* 8**,** e53987.

Bodenhausen, N., Horton, M.W., and Bergelson, J. (2013). Bacterial communities associated with the leaves and the roots of *Arabidopsis thaliana*. *PLoS One* 8**,** e56329.

Bokulich, N.A., Thorngate, J.H., Richardson, P.M., and Mills, D.A. (2014). Microbial biogeography of wine grapes is conditioned by cultivar, vintage, and climate. *Proc Natl Acad Sci U S A* 111**,** E139-E148.

Bragg, L.M., Stone, G., Butler, M.K., Hugenholtz, P., and Tyson, G.W. (2013). Shining a light on dark sequencing: characterising errors in Ion Torrent PGM data. *Plos Comput Biol* 9.

Cordier, T., Robin, C., Capdevielle, X., Desprez-Loustau, M.L., and Vacher, C. (2012a). Spatial variability of phyllosphere fungal assemblages: genetic distance predominates over geographic distance in a European beech stand (*Fagus sylvatica*). *Fungal Ecol* 5**,** 509-520.

Cordier, T., Robin, C., Capdevielle, X., Fabreguettes, O., Desprez-Loustau, M.L., and Vacher, C. (2012b). The composition of phyllosphere fungal assemblages of European beech (*Fagus sylvatica*) varies significantly along an elevation gradient. *New Phytol* 196**,** 510-519.

Davey, M.L., Heegaard, E., Halvorsen, R., Kauserud, H., and Ohlson, M. (2013). Amplicon-pyrosequencing-based detection of compositional shifts in bryophyte-associated fungal communities along an elevation gradient. *Mol Ecol* 22**,** 368-383.

Dohm, J.C., Lottaz, C., Borodina, T., and Himmelbauer, H. (2008). Substantial biases in ultra-short read data sets from high-throughput DNA sequencing. *Nucleic Acids Res* 36**,** e105.

Fierer, N., Mccain, C.M., Meir, P., Zimmermann, M., Rapp, J.M., Silman, M.R., and Knight, R. (2011). Microbes do not follow the elevational diversity patterns of plants and animals. *Ecology* 92**,** 797-804.

Finkel, O.M., Burch, A.Y., Elad, T., Huse, S.M., Lindow, S.E., Post, A.F., and Belkin, S. (2012). Distance-decay relationships partially determine diversity patterns of phyllosphere bacteria on *Tamrix* trees across the Sonoran desert. *Appl Environ Microbiol* 78**,** 6187-6193.

Finkel, O.M., Burch, A.Y., Lindow, S.E., Post, A.F., and Belkin, S. (2011). Geographical location determines the population structure in phyllosphere microbial communities of a salt-excreting desert tree. *Appl Environ Microbiol* 77**,** 7647-7655.

Gilles, A., Meglecz, E., Pech, N., Ferreira, S., Malausa, T., and Martin, J.F. (2011). Accuracy and quality assessment of 454 GS-FLX Titanium pyrosequencing. *BMC Genomics* 12**,** 245.

Glenn, T.C. (2011). Field guide to next-generation DNA sequencers. *Mol Ecol Resour* 11**,** 759-769.

Hillier, L.W., Marth, G.T., Quinlan, A.R., Dooling, D., Fewell, G., Barnett, D., Fox, P., Glasscock, J.I., Hickenbotham, M., Huang, W., Magrini, V.J., Richt, R.J., Sander, S.N., Stewart, D.A., Stromberg, M., Tsung, E.F., Wylie, T., Schedl, T., Wilson, R.K., and Mardis, E.R. (2008). Whole-genome sequencing and variant discovery in *C. elegans*. *Nat Methods* 5**,** 183-188.

Huse, S.M., Huber, J.A., Morrison, H.G., Sogin, M.L., and Welch, D.M. (2007). Accuracy and quality of massively parallel DNA pyrosequencing. *Genome Biol* 8**,** R143.

Jackson, C.R., Randolph, K.C., Osborn, S.L., and Tyler, H.L. (2013). Culture dependent and independent analysis of bacterial communities associated with commercial salad leaf vegetables. *BMC Microbiol* 13.

Jumpponen, A., and Jones, K.L. (2009). Massively parallel 454 sequencing indicates hyperdiverse fungal communities in temperate *Quercus macrocarpa* phyllosphere. *New Phytologist* 184**,** 438-448.

Jumpponen, A., and Jones, K.L. (2010). Seasonally dynamic fungal communities in the Quercus macrocarpa phyllosphere differ between urban and nonurban environments. *New Phytologist* 186**,** 496-513.

Jünemann, S., Sedlazeck, F.J., Prior, K., Albersmeier, A., John, U., Kalinowski, J., Mellmann, A., Goesmann, A., Von Haeseler, A., Stoye, J., and Harmsen, D. (2013). Updating benchtop sequencing performance comparison. *Nat Biotechnol* 31**,** 294-296.

Kemler, M., Garnas, J., Wingfield, M.J., Gryzenhout, M., Pillay, K.A., and Slippers, B. (2013). Ion Torrent PGM as tool for fungal community analysis: a case study of endophytes in *Eucalyptus grandis* reveals high taxonomic diversity. *PLoS One* 8.

Kim, M., Singh, D., Lai-Hoe, A., Go, R., Rahim, R.A., Ainuddin, A.N., Chun, J., and Adams, J.M. (2012). Distinctive phyllosphere bacterial communities in tropical trees. *Microb Ecol* 63**,** 674-681.

Koopman, M.M., Fuselier, D.M., Hird, S., and Carstens, B.C. (2010). The carnivorous pale pitcher plant harbors diverse, distinct, and time-dependent bacterial communities. *Appl Environ Microbiol* 76**,** 1851-1860.

Leff, J.W., and Fierer, N. (2013). Bacterial communities associated with the surfaces of fresh fruits and vegetables. *PLoS One* 8.

Leveau, J.H., and Tech, J.J. (2011). Grapevine microbiomics: bacterial diversity on grape leaves and berries revealed by high-throughput sequence analysis of 16S rRNA amplicons. *Acta Hort.* 905**,** 31 - 42.

Lind, C., Ferriola, D., Mackiewicz, K., Heron, S., Rogers, M., Slavich, L., Walker, R., Hsiao, T., Mclaughlin, L., D'arcy, M., Gai, X., Goodridge, D., Sayer, D., and Monos, D. (2010). Next-generation sequencing: the solution for high-resolution, unambiguous human leukocyte antigen typing. *Hum Immunol* 71**,** 1033-1042.

Liu, L., Li, Y., Li, S., Hu, N., He, Y., Pong, R., Lin, D., Lu, L., and Law, M. (2012). Comparison of next-generation sequencing systems. *J Biomed Biotechnol* 2012**,** 251364.

Loman, N.J., Misra, R.V., Dallman, T.J., Constantinidou, C., Gharbia, S.E., Wain, J., and Pallen, M.J. (2012). Performance comparison of benchtop high-throughput sequencing platforms. *Nat Biotechnol* 30**,** 434-439.

Lopez-Velasco, G., Carder, P.A., Welbaum, G.E., and Ponder, M.A. (2013). Diversity of the spinach (*Spinacia oleracea*) spermosphere and phyllosphere bacterial communities. *FEMS Microbiol Lett*.

Lopez-Velasco, G., Welbaum, G.E., Boyer, R.R., Mane, S.P., and Ponder, M.A. (2011). Changes in spinach phylloepiphytic bacteria communities following minimal processing and refrigerated storage described using pyrosequencing of 16S rRNA amplicons. *J Appl Microbiol* 110**,** 1203-1214.

Lucero, M.E., Unc, A., Cooke, P., Dowd, S., and Sun, S. (2011). Endophyte microbiome diversity in micropropagated *Atriplex canescens* and *Atriplex torreyi* var *griffithsii*. *PLoS One* 6**,** e17693.

Maignien, L., Deforce, E.A., Chafee, M.E., Eren, A.M., and Simmons, S.L. (2014). Ecological succession and stochastic variation in the assembly of *Arabidopsis thaliana* phyllosphere communities. *MBio* 5**,** e00682-00613.

Mardis, E.R. (2013). Next-generation sequencing platforms. *Annu Rev Anal Chem (Palo Alto Calif)* 6**,** 287-303.

Margulies, M., Egholm, M., Altman, W.E., Attiya, S., Bader, J.S., Bemben, L.A., Berka, J., Braverman, M.S., Chen, Y.J., Chen, Z., Dewell, S.B., Du, L., Fierro, J.M., Gomes, X.V., Godwin, B.C., He, W., Helgesen, S., Ho, C.H., Irzyk, G.P., Jando, S.C., Alenquer, M.L., Jarvie, T.P., Jirage, K.B., Kim, J.B., Knight, J.R., Lanza, J.R., Leamon, J.H., Lefkowitz, S.M., Lei, M., Li, J., Lohman, K.L., Lu, H., Makhijani, V.B., Mcdade, K.E., Mckenna, M.P., Myers, E.W., Nickerson, E., Nobile, J.R., Plant, R., Puc, B.P., Ronan, M.T., Roth, G.T., Sarkis, G.J., Simons, J.F., Simpson, J.W., Srinivasan, M., Tartaro, K.R., Tomasz, A., Vogt, K.A., Volkmer, G.A., Wang, S.H., Wang, Y., Weiner, M.P., Yu, P., Begley, R.F., and Rothberg, J.M. (2005). Genome sequencing in microfabricated high-density picolitre reactors. *Nature* 437**,** 376-380.

Merriman, B., Rothberg, J.M., and Team, I.T.R.D. (2012). Progress in Ion Torrent semiconductor chip based sequencing. *Electrophoresis* 33**,** 3397-3417.

Minoche, A.E., Dohm, J.C., and Himmelbauer, H. (2011). Evaluation of genomic high-throughput sequencing data generated on Illumina HiSeq and Genome Analyzer systems. *Genome Biol* 12.

Nguyen, P., Ma, J., Pei, D., Obert, C., Cheng, C., and Geiger, T.L. (2011). Identification of errors introduced during high throughput sequencing of the T cell receptor repertoire. *BMC Genomics* 12**,** 106.

Niu, B.F., Fu, L.M., Sun, S.L., and Li, W.Z. (2010). Artificial and natural duplicates in pyrosequencing reads of metagenomic data. *BMC Bioinformatics* 11.

Ottesen, A.R., Peña, A.G., White, J.R., Pettengill, J.B., Li, C., Allard, S., Rideout, S., Allard, M., Hill, T., Evans, P., Strain, E., Musser, S., Knight, R., and Brown, E. (2013). Baseline survey of the anatomical microbial ecology of an important food plant: *Solanum lycopersicum* (tomato). *BMC Microbiol* 13.

Perazzolli, M., Antonielli, L., Storari, M., Puopolo, G., Pancher, M., Giovannini, O., Pindo, M., and Pertot, I. (2014). Resilience of the natural phyllosphere microbiota of the grapevine to chemical and biological pesticides. *Appl Environ Microbiol***,** doi:10.1128/AEM.00415-00411.

Peršoh, D. (2013). Factors shaping community structure of endophytic fungi-evidence from the *Pinus*-*Viscum*-system. *Fungal Diversity* 60**,** 55-69.

Pettengill, J.B., Mcavoy, E., White, J.R., Allard, M., Brown, E., and Ottesen, A. (2012). Using metagenomic analyses to estimate the consequences of enrichment bias for pathogen detection. *BMC Res Notes* 5**,** 378.

Pinto, C., Pinho, D., Sousa, S., Pinheiro, M., Egas, C., and Gomes, A.C. (2014). Unravelling the diversity of grapevine microbiome. *Plos One* 9.

Quail, M.A., Kozarewa, I., Smith, F., Scally, A., Stephens, P.J., Durbin, R., Swerdlow, H., and Turner, D.J. (2008). A large genome center's improvements to the Illumina sequencing system. *Nat Methods* 5**,** 1005-1010.

Quail, M.A., Smith, M., Coupland, P., Otto, T.D., Harris, S.R., Connor, T.R., Bertoni, A., Swerdlow, H.P., and Gu, Y. (2012). A tale of three next generation sequencing platforms: comparison of Ion Torrent, Pacific Biosciences and Illumina MiSeq sequencers. *BMC Genomics* 13.

Quince, C., Lanzen, A., Davenport, R.J., and Turnbaugh, P.J. (2011). Removing noise from pyrosequenced amplicons. *BMC Bioinformatics* 12.

Quinlan, A.R., Stewart, D.A., Stromberg, M.P., and Marth, G.T. (2008). Pyrobayes: an improved base caller for SNP discovery in pyrosequences. *Nat Methods* 5**,** 179-181.

Rastogi, G., Sbodio, A., Tech, J.J., Suslow, T.V., Coaker, G.L., and Leveau, J.H.J. (2012). Leaf microbiota in an agroecosystem: spatiotemporal variation in bacterial community composition on field-grown lettuce. *Isme Journal* 6**,** 1812-1822.

Redford, A.J., Bowers, R.M., Knight, R., Linhart, Y., and Fierer, N. (2010). The ecology of the phyllosphere: geographic and phylogenetic variability in the distribution of bacteria on tree leaves. *Environ Microbiol* 12**,** 2885-2893.

Reisberg, E.E., Hildebrandt, U., Riederer, M., and Hentschel, U. (2013). Distinct phyllosphere bacterial communities on *Arabidopsis* wax mutant leaves. *PLoS One* 8.

Romero, F.M., Marina, M., and Pieckenstain, F.L. (2014). The communities of tomato (*Solanum lycopersicum* L.) leaf endophytic bacteria, analyzed by 16S-ribosomal RNA gene pyrosequencing. *FEMS Microbiol Let* 351**,** 187-194.

Shade, A., Mcmanus, P.S., and Handelsman, J. (2013). Unexpected diversity during community succession in the apple flower microbiome. *MBio* 4.

Shendure, J., and Ji, H. (2008). Next-generation DNA sequencing. *Nat Biotechnol* 26**,** 1135-1145.

Sylla, J., Alsanius, B.W., Krüger, E., Reineke, A., Strohmeier, S., and Wohanka, W. (2013). Leaf microbiota of strawberries as affected by biological control agents. *Phytopathology* 103**,** 1001-1011.

Telias, A., White, J.R., Pahl, D.M., Ottesen, A.R., and Walsh, C.S. (2011). Bacterial community diversity and variation in spray water sources and the tomato fruit surface. *BMC Microbiol* 11.

Thompson, J.F., and Milos, P.M. (2011). The properties and applications of single-molecule DNA sequencing. *Genome Biol* 12.

Unterseher, M., Peršoh, D., and Schnittler, M. (2013). Leaf-inhabiting endophytic fungi of European Beech (*Fagus sylvatica* L.) co-occur in leaf litter but are rare on decaying wood of the same host. *Fungal Diversity* 60**,** 43-54.

Vandenbroucke, I., Van Marck, H., Verhasselt, P., Thys, K., Mostmans, W., Dumont, S., Van Eygen, V., Coen, K., Tuefferd, M., and Aerssens, J. (2011). Minor variant detection in amplicons using 454 massive parallel pyrosequencing: experiences and considerations for successful applications. *Biotechniques* 51**,** 167-177.

Williams, T.R., Moyne, A.L., Harris, L.J., and Marco, M.L. (2013). Season, irrigation, leaf age, and *Escherichia coli* inoculation influence the bacterial diversity in the lettuce phyllosphere. *PLoS One* 8.

Zimmerman, N.B., and Vitousek, P.M. (2012). Fungal endophyte communities reflect environmental structuring across a Hawaiian landscape. *Proc Natl Acad Sci U S A* 109**,** 13022-13027.
